# Supplementary material
Source: PubMed Central journal article supplement (PMC3105734)
Supplement: ismej2010151x3.pdf [file ismej2010151x3.pdf]

T A T G T T T G C T T C A G T G C T T A T T T T G C C T C X Majority

-----+-----+-----+  
                          10                          20                          30

-----+-----+-----+  
1 T A T G T C T G C T T C A G T G C T T A A C T T G C C C C A clade C gi 156466964  
1 T A T G T T T G C T T C A G T G C T T A T T T T A C C T C ' clade D gi 156466903

X X T T T G C A X X X A G G T T G T G T T T C T G C C T T G Majority

-----+-----+-----+  
                          40                          50                          60

-----+-----+-----+  
31 A C T T T G C A A G C A G G A T G T G T T T C T G C C T T G clade C gi 156466964  
31 ' ' C T T G C A ' ' ' A G G T T C T G T C G C A A C C T T G clade D gi 156466903

T G T T C T T G T G A G C T A T T G G T T T C T T T G C C C Majority

-----+-----+-----+  
                          70                          80                          90

-----+-----+-----+  
61 C G T T C T T A T G A G C T A T T G C C C T C T G A G C C A clade C gi 156466964  
61 T G C C C T G G C C A G C C A T G G G T T A A C T T G C C C clade D gi 156466903

A T G G C T T G T T G A T T

-----+-----  
                          100

-----+-----+-----+  
91 A T G G C T T G T T A A T T clade C gi 156466964  
91 A T G G C T T G C T G A G T clade D gi 156466903
